# Supplementary material for: A portable urine analyzer based on colorimetric detection
Source: Royal Society of Chemistry journal article supplement (doi:10.1039/c7ay00780a), 2017-01-01
Supplement: c7ay00780a1.pdf [file c7ay00780a1.pdf]

## Supplementary materials

**Table S1.** Imaging parameters of cellphones with different brands and/or different models under the same brand.

| Brand   | Product model  | Resolution              | Rear camera pixels | Front-facing camera pixels |
|---------|----------------|-------------------------|--------------------|----------------------------|
| SAMSUNG | SM-C5000       | 1920×1080 (FHD*, 1080P) | 16 million         | 8 million                  |
| MI      | Note2          | 1280×720 (HD*, 720P)    | 8 million          | 2 million                  |
| HUAWEI  | Che2-TL00H     | 1280×720 (HD*, 720P)    | 13 million         | 5 million                  |
| Apple   | iPhone 5s      | 1136×640                | 8 million          | 1.2 million                |
| Apple   | iPhone 6       | 1334×750                | 8 million          | 1.2 million                |
| Apple   | iPhone 6S      | 1334×750                | 12 million         | 5 million                  |
| Apple   | iPhone 6S Plus | 1920×1080 (FHD*, 1080P) | 12 million         | 5 million                  |
| Apple   | iPhone SE      | 1136×640                | 12 million         | 1.2 million                |

\*FHD : Full High Definition; HD: High Definition

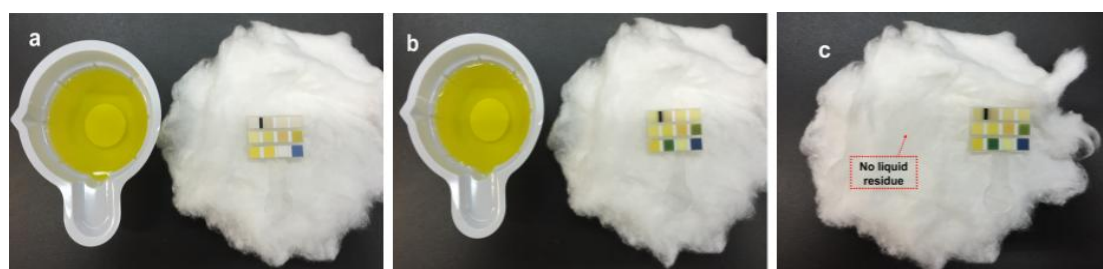

**Figure S1.** (a) Before the reaction unit contacts the colored liquid. (b) After the reaction unit contacts the colored liquid. The reaction unit was placed on the white cotton for contrast. (c) The reaction unit was removed from its original position, and no residual liquid was found on the cotton.

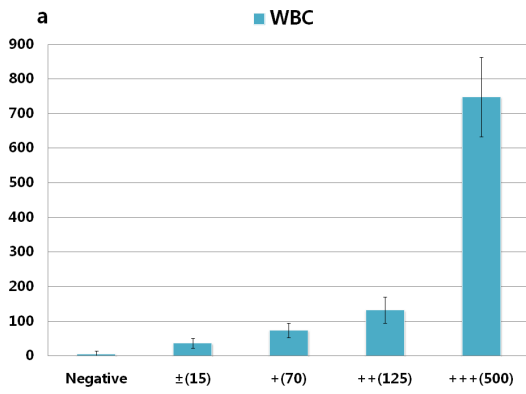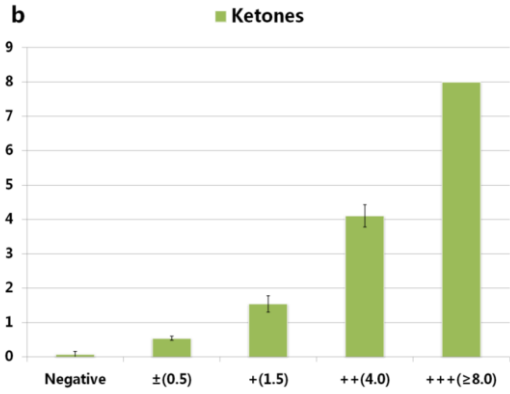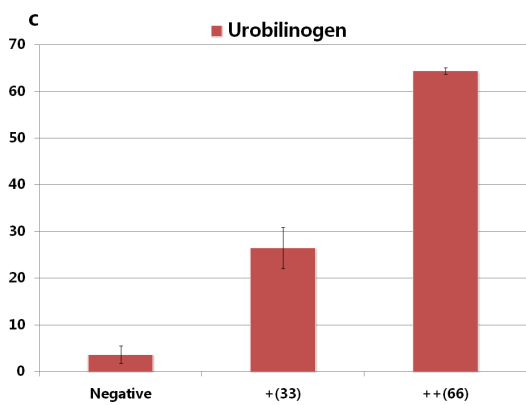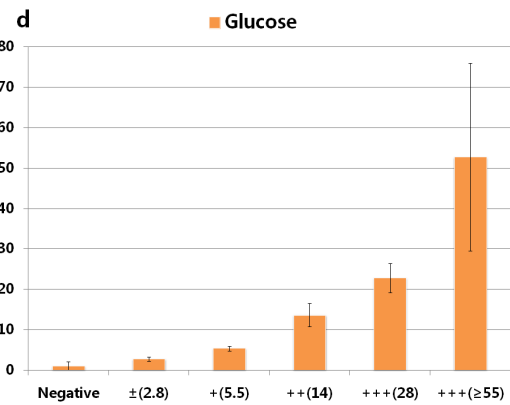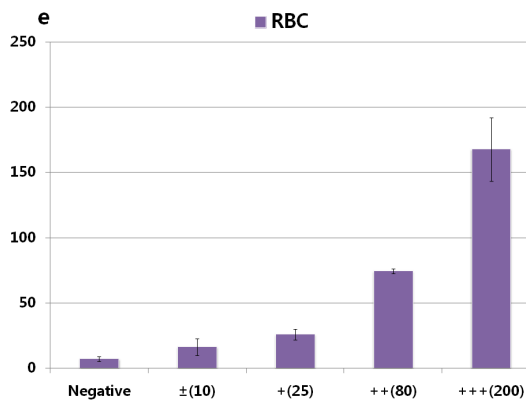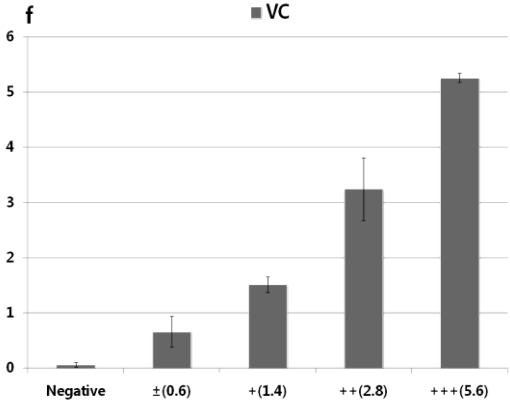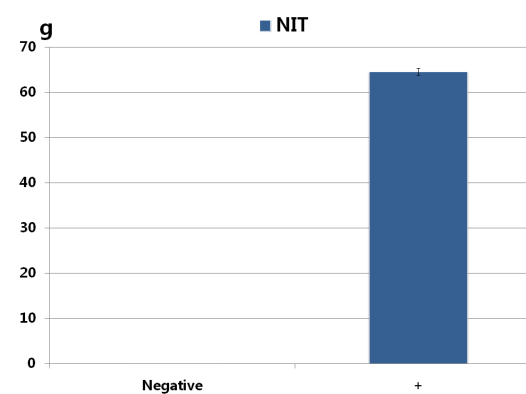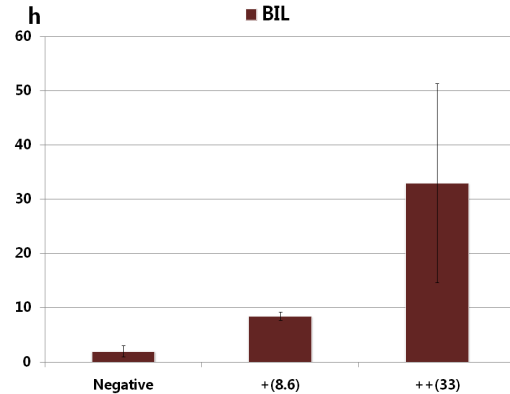

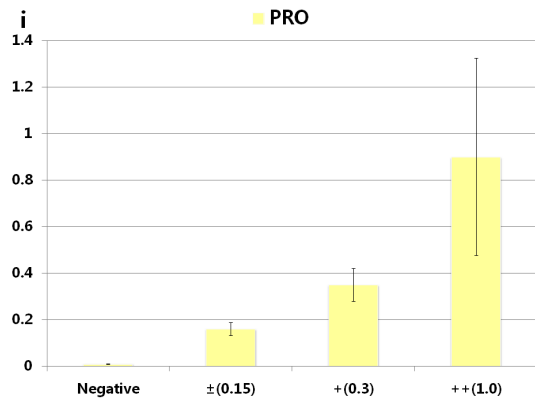

**Figure S2.** Results of dipstick tests (URIT 11G<sup>®</sup>, URIT) from our portable device and the hospital instrument (Urit-500B). The horizontal coordinates represent the true values of the human urine samples; the vertical coordinates represent the values measured by the portable device. (a) WBC, (b) ketones, (c) urobilinogen, (d) glucose, (e) RBC, (f) VC, (g) nitrite, (h) bilirubin ,and(i) protein.

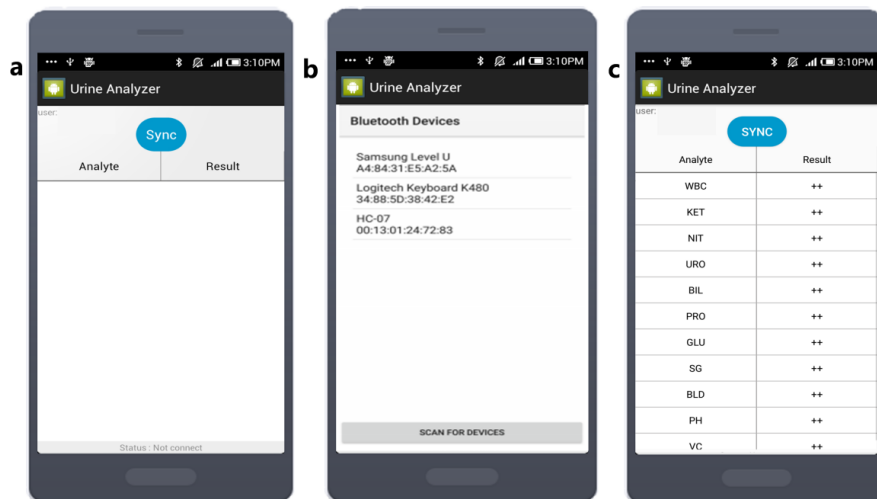

**Figure S3.** The screenshots of the Android app used to show the detection results on the cellphone.(a) Main menu, (b) Scanning for the buletooth device, (c) The interface for results display.

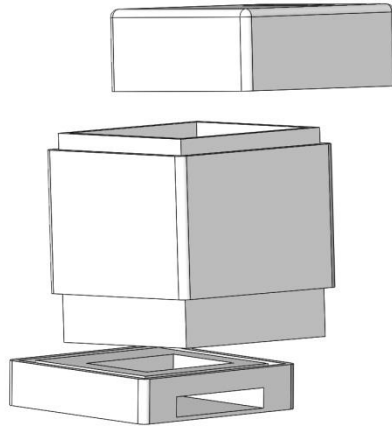

**Figure S4.** The mechanical structure of the portable urine analyzer.
